# Supplementary material for: A new class of DNA quadruplexes formed by oligodeoxyribonucleotides containing a 3′-3′ or 5′-5′ inversion of polarity site
Source: Royal Society of Chemistry journal article supplement (doi:10.1039/b504455c), 2005-01-01
Supplement: b504455c_1.pdf [file b504455c_1.pdf]

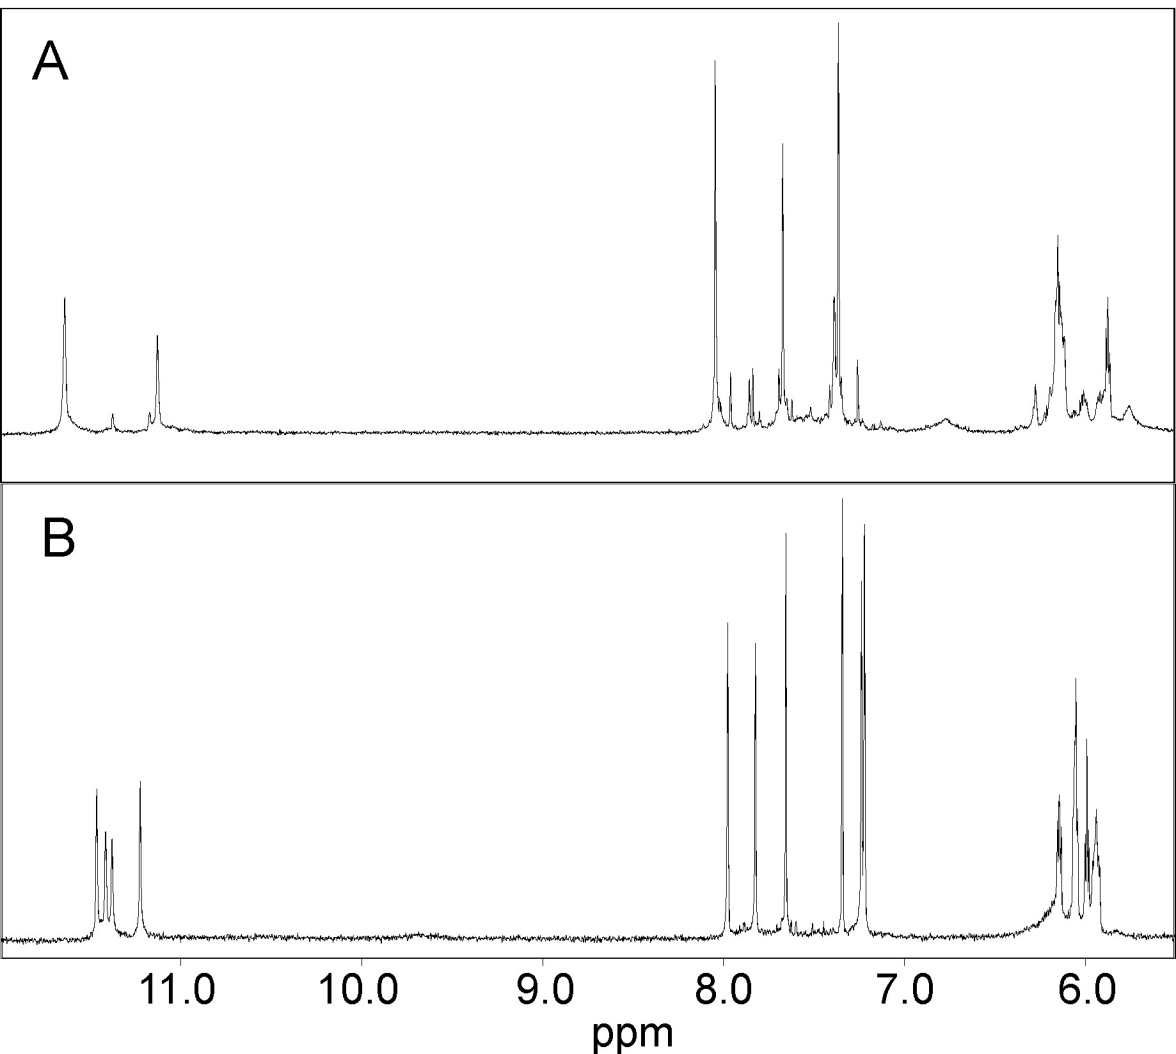

Selected regions of 1D <sup>1</sup>H-NMR spectra (700 MHz) of Q33 (**A**) and Q55 (**B**) 2 mM in 0.6 ml (H<sub>2</sub>O/D<sub>2</sub>O 9:1) buffer solution having 10 mM KH<sub>2</sub>PO<sub>4</sub>, 70 mM KCl, 0.2 mM EDTA, pH 7.0 at 25°C. The guanine imino protons involved in G-tetrad formation resonate between 11.0 and 12.0 ppm. The narrow non-exchangeable base protons resonate between 7.0 and 8.0 ppm.
