# Supplementary figures and images for: A new class of DNA quadruplexes formed by oligodeoxyribonucleotides containing a 3′-3′ or 5′-5′ inversion of polarity site
Source: Royal Society of Chemistry journal article supplement (doi:10.1039/b504455c), 2005-01-01

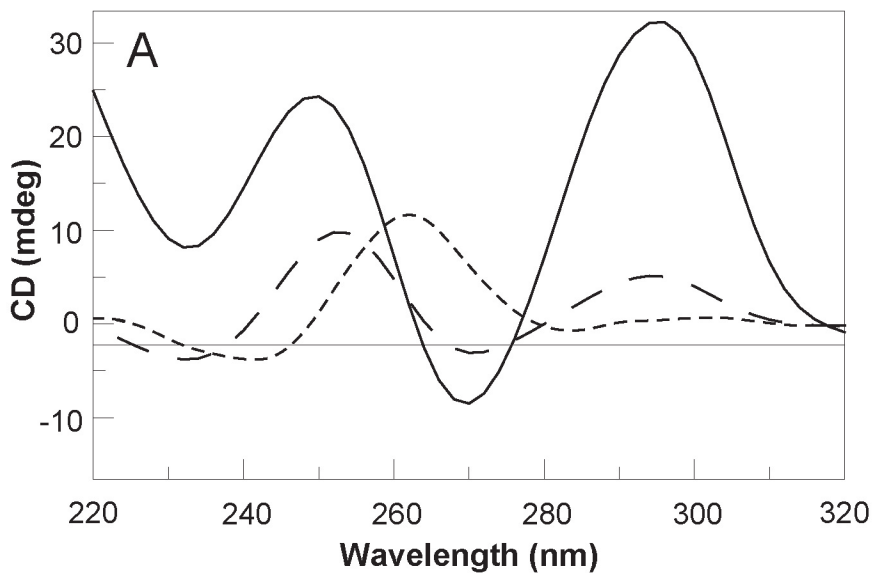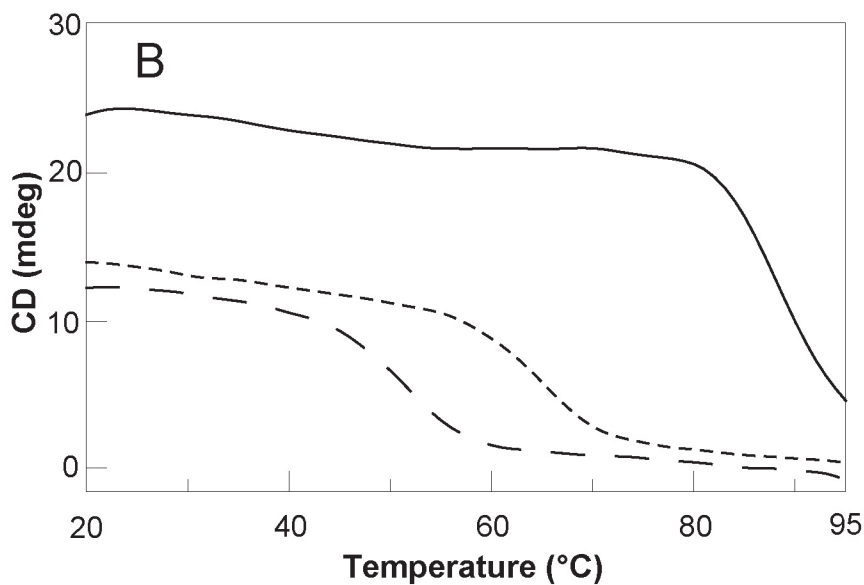

CD spectra (**A**) and CD melting experiments (**B**) of  $[d(TGGGGT)]_4$  (- - -), Q33 (— —) and Q55 (——)

Supplement: b504455c_2.pdf [file b504455c_2.pdf]
